# Supplementary material for: Conidium Specific Polysaccharides in Aspergillus fumigatus
Source: MDPI journal article supplement (doi:10.3390/jof9020155), 2023-01-24
Supplement: s1 [file s1]

**Table S1.** *A. fumigatus* strains used in this study.

| Strains                        | Deleted genes                                                                                                                                                                                                                        | references |
|--------------------------------|--------------------------------------------------------------------------------------------------------------------------------------------------------------------------------------------------------------------------------------|------------|
| KU80 $\Delta$ pyrG             | Parental strain                                                                                                                                                                                                                      | [13]       |
| $\Delta$ ugm1                  | AFUA_4G12690                                                                                                                                                                                                                         | [30]       |
| $\Delta$ och1-4 (GT32 family)  | AFUA_8G02040<br>AFUA_6G14040<br>AFUA_1G01380<br>AFUA_5G08580                                                                                                                                                                         | [31]       |
| $\Delta$ GT62                  | MNN9 AFUA_2G01450<br>ANP1 AFUA_4G06870<br>VAN1 AFUA_2G15910                                                                                                                                                                          | [12]       |
| $\Delta$ gell-2 (GH-72)        | GEL1 AFUA_2G01170<br>GEL2 AFUA_6G11390                                                                                                                                                                                               | [51]       |
| $\Delta$ ExoG (sextuple GH-55) | EXG5 AFUA_6G11980<br>EXG6 AFUA_6G13270<br>EXG7 AFUA_3G07520<br>EXG8 AFUA_1G14450<br>EXG9 AFUA_2G00430<br>EXG10 AFUA_4G03350                                                                                                          | [48]       |
| $\Delta$ EndoG                 | ENG1 AFUA_1G04260 (GH81)<br>ENG2 AFUA_2G14360 (GH16)<br>ENG3 AFUA_1G05290 (GH16)<br>ENG4 AFUA_5G02280 (GH16)<br>ENG5 AFUA_4G13360 (GH16)                                                                                             | [39]       |
| $\Delta$ EndoG/ $\Delta$ ExoG  | EXG5 AFUA_6G11980<br>EXG6 AFUA_6G13270<br>EXG7 AFUA_3G07520<br>EXG8 AFUA_1G14450<br>EXG9 AFUA_2G00430<br>EXG10 AFUA_4G03350<br>ENG1 AFUA_1G04260<br>ENG2 AFUA_2G14360<br>ENG3 AFUA_1G05290<br>ENG4 AFUA_5G02280<br>ENG5 AFUA_4G13360 | [48]       |
| $\Delta$ 5-GH17                | BGT1 AFUA_1G11460<br>BGT2 AFUA_3G00270<br>BGT3 AFUA_5G08780<br>SCW4 AFUA_6G12380<br>SCW11 AFUA_8G05610                                                                                                                               | [47]       |

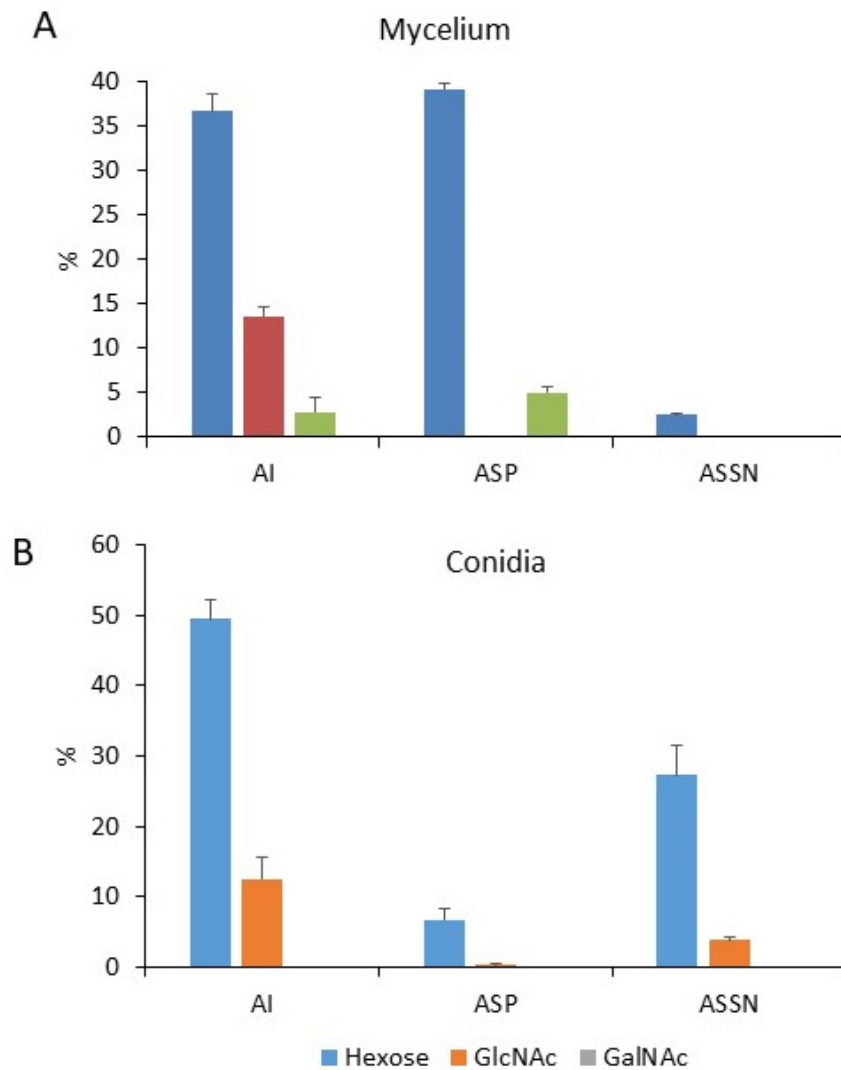

**Figure S1. Sugar analysis of cell wall fractions of mycelium and conidia from *Δku80 A. fumigatus* parental strain, grown on solid malt medium.** A, composition of mycelium cell wall; B, composition of conidia cell wall. The composition is expressed in % of total cell wall sugar. Analyses were performed on three independent biological replicates.



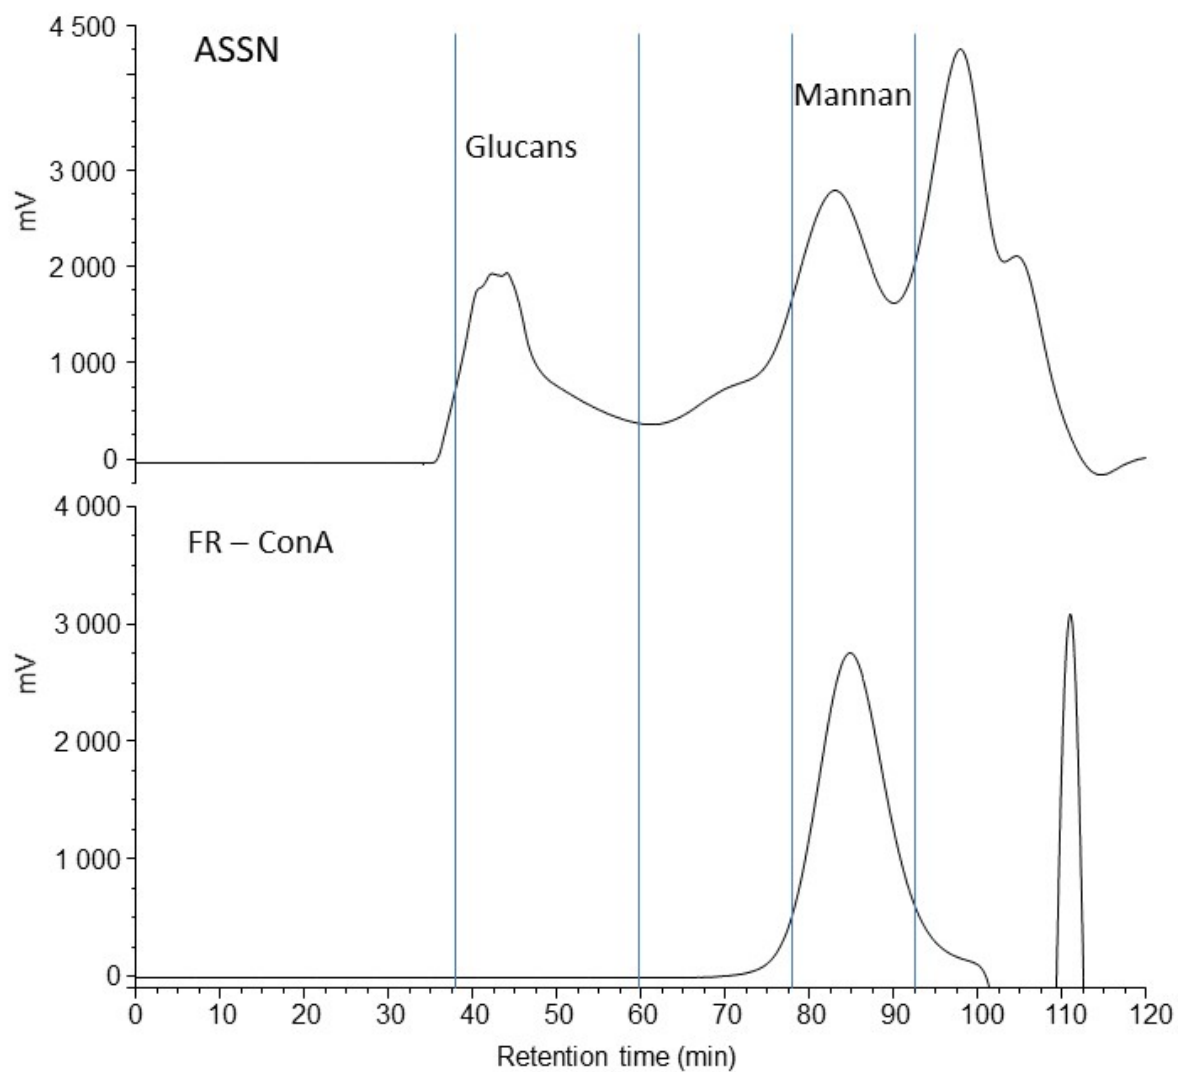

**Figure S3. Gel filtration chromatography on Superdex S200 of total ASSN fraction from the *ugm1* mutant (ASSN) and the corresponding Concanavalin-A bound fraction (FR-ConA).** None of the fractions was submitted to laminarinase digestion.

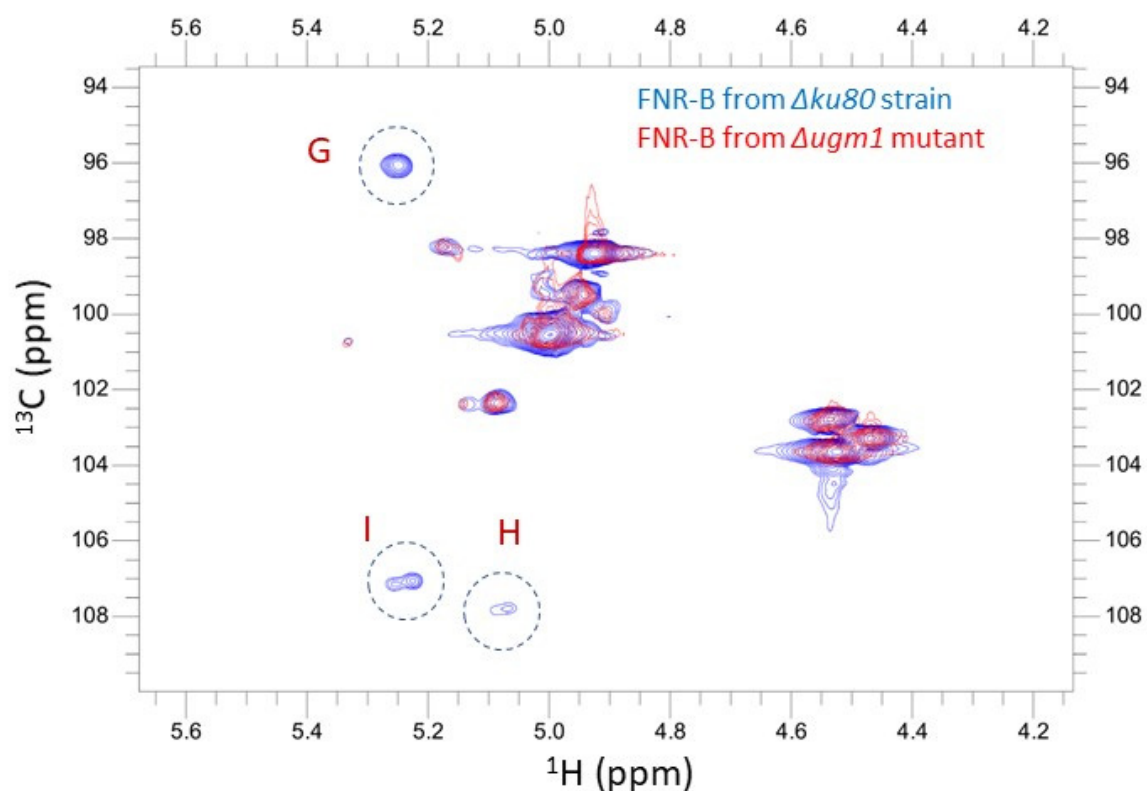

**Figure S4. Comparison of the  $^1\text{H}$   $^{13}\text{C}$ -HSQC anomeric region of FNR-B fractions extracted from the  $\Delta ku80$  parental strain (blue) and the  $\Delta ugm1$  mutant (red). The mannan extracted from the  $\Delta ugm1$  mutant lacks galactofuranose residues H and I (5-5.3 ppm  $^1\text{H}$ ; 107-108 ppm  $^{13}\text{C}$ ) and an unidentified residue (G, 5.25 ppm  $^1\text{H}$  ; 96.1 ppm  $^{13}\text{C}$ ) indicated by dashed blue circles. Quantification of galactofuranose based on the integration of anomeric signals: 2.5% of total galactose residues and no covalent linkage with G3Man has been identified.**

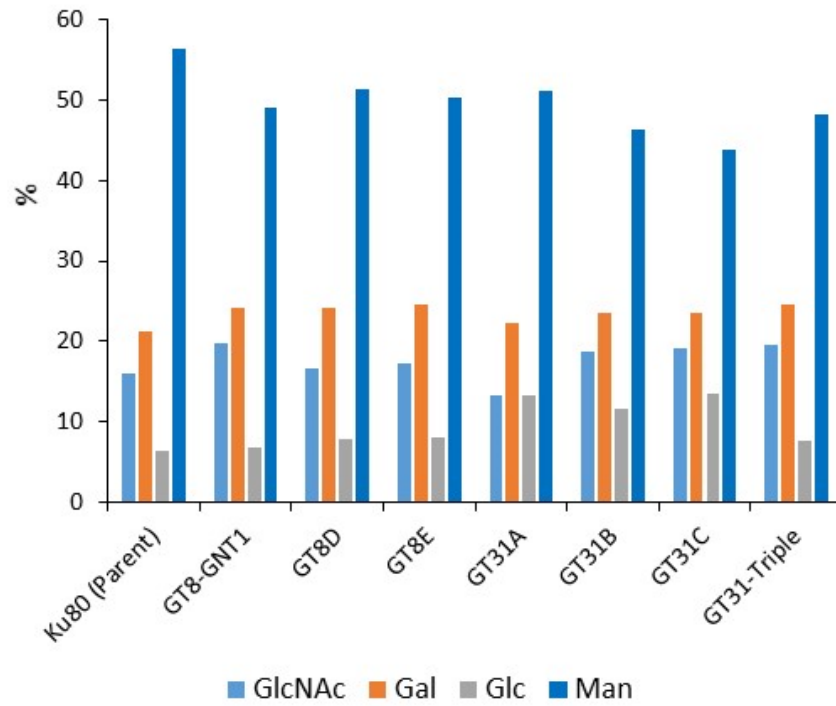

**Figure S5. Monosaccharide composition of the FNR fractions isolated from *A. fumigatus* glycosyltransferase mutants conidia ASSN.** Single mutants: GT8-GNT1, AFUA\_8G02690; GT8D: AFUA\_8G01730; GT8E: AFUA\_5G09070; GT31A: AFUA\_2G17320; GT31B: AFUA\_6G00520; GT31C: AFUA\_3G07220; GT31-Triple: triple mutant  $\Delta$ gt31A/ $\Delta$ gt31B/ $\Delta$ gt31C.
